# Supplementary material
Source: PubMed Central journal article supplement (PMC7335936)
Supplement: mmc1.pdf [file mmc1.pdf]

**Biophysical Journal, Volume 119**

**Supplemental Information**

**Relaxation Times of Ligand-Receptor Complex Formation Control T  
Cell Activation**

**Hamid Teimouri and Anatoly B. Kolomeisky**

# Relaxation times of ligand-receptor complex formation control T cell activation

Hamid Teimouri and Anatoly B Kolomeisky

June 3, 2020

In this supporting information we provide details of calculations for the equations in the main text.

## 1 Calculation of local relaxation times

We define a function  $P_n(t)$  as the probability to reach the state  $n$  at time  $t$ . The dynamics in the system can be described by a set of master equations:

$$\frac{dP_0(t)}{dt} = k_{off} \sum_{n=1}^N P_n(t) - k_{on}P_0(t), \quad (S1)$$

for  $n = 0$ , and

$$\frac{dP_1(t)}{dt} = k_{on}P_0(t) - (k_p + k_{off})P_1(t), \quad (S2)$$

for  $n = 1$ , and

$$\frac{dP_n(t)}{dt} = k_pP_{n-1}(t) - (k_p + k_{off})P_n(t), \quad (S3)$$

for  $1 < n < N$  and

$$\frac{dP_N(t)}{dt} = k_pP_{N-1}(t) - k_{off}P_N(t), \quad (S4)$$

for  $n = N$ . We also have the normalization condition,

$$\sum_{n=0}^N P_n(t) = 1. \quad (S5)$$

In the Laplace language, these equations can be rewritten as

$$(s + k_p + k_{off})\tilde{P}_n(s) = k_p\tilde{P}_{n-1}(s); \quad (S6)$$

$$(s + k_p + k_{off})\tilde{P}_1(s) = k_{on}\tilde{P}_0(s); \quad (S7)$$

$$(s + k_{off})\tilde{P}_N(s) = k_p\tilde{P}_{N-1}(s); \quad (S8)$$

$$(s + k_{on})\tilde{P}_0(s) = k_{off} \sum_{n=1}^N \tilde{P}_n(s) + 1. \quad (\text{S9})$$

The normalization equation gives

$$\sum_{n=0}^N \tilde{P}_n(s) = \frac{1}{s}. \quad (\text{S10})$$

Eqs. S6, S7, S8, S9 can be solved, yielding

$$\tilde{P}_0(s) = \frac{(s + k_{off})}{s(s + k_{on} + k_{off})}, \quad (\text{S11})$$

for  $n = 0$ ; and

$$\tilde{P}_n(s) = \frac{k_{on}(s + k_{off})k_p^{n-1}}{s(s + k_{on} + k_{off})(s + k_p + k_{off})^n}, \quad (\text{S12})$$

for  $0 < n < N$ ; and

$$\tilde{P}_N(s) = \frac{k_{on}k_p^{N-1}}{s(s + k_{on} + k_{off})(s + k_p + k_{off})^{N-1}}, \quad (\text{S13})$$

and for  $n = N$ . The stationary probabilities can be found from Eqns. S2, S3, S4 for large times when the left sides of these equations are equal to zero. We obtain then,

$$P_0 = \frac{k_{off}}{k_{on} + k_{off}}. \quad (\text{S14})$$

For  $0 < n < N$  it gives

$$P_n = \frac{k_{on}k_{off}k_p^{n-1}}{(k_{on} + k_{off})(k_p + k_{off})^n}, \quad (\text{S15})$$

and for  $n = N$ ,

$$P_N = \frac{k_{on}k_p^{N-1}}{(k_{on} + k_{off})(k_p + k_{off})^{N-1}}. \quad (\text{S16})$$

Now let us derive the times to reach the stationary states at the site  $n$ . We define a relaxation function  $R_n(t)$ , which is given by

$$R_n(t) = 1 - \frac{P_n(t)}{P_n^{(s)}}, \quad (\text{S17})$$

where  $P_n^{(s)}$  is the stationary concentration in the state  $n$ . The physical meaning of this function is the relative distance to the stationary state at the state  $n$ . For  $n > 0$ , we have  $R_n(t = 0) = 1$ , and  $R_n(t \rightarrow \infty) = 0$ . Therefore, it can be shown that the average time to reach the stationary concentration at the state  $n$  is equal to  $\tau_n = \int_0^\infty R_n(t) dt = \tilde{R}_n(s = 0)$ . Using this expression, we obtain the times to reach the stationary states at the fully modified complex  $n = N$ ,

$$\tau_0 = \frac{1}{k_{on} + k_{off}}; \quad (\text{S18})$$

$$\tau_n = \frac{1}{k_{on} + k_{off}} + \frac{n}{k_p + k_{off}} - \frac{1}{k_{off}}; \quad (\text{S19})$$

and

$$\tau_N = \frac{1}{k_{on} + k_{off}} + \frac{N-1}{k_p + k_{off}}. \quad (\text{S20})$$

Fig. S1 presents our theoretical predictions on the dependence of the relaxation times on the phosphorylation rate  $k_p$ , on the complex formation rate  $k_{on}$  and on the complex dissociation rate  $k_{off}$ . It shows that for experimentally relevant parameters  $\tau_N$  depends relatively weakly on the association rate, while it is more sensitive to changes in the dissociation and phosphorylation rates. Increasing  $k_p$  or  $k_{off}$  lowers the relaxation time. The reason for this behavior can be understood from the chemical kinetic scheme. The dominating term in the relaxation time [see Eq. (S20)] is the time to move through the sequence of the phosphorylation events starting from the state  $n = 1$  and finishing in the state  $n = N$ , and it depends only on  $k_p$  and  $k_{off}$ . For larger  $k_{on}$  and  $k_p$ , the phosphorylations are fast and this lowers the overall relaxation times, as expected. In addition, increasing  $k_{off}$  accelerates the formation of the stationary state between TCR-ligand bound and ligand unbound states.

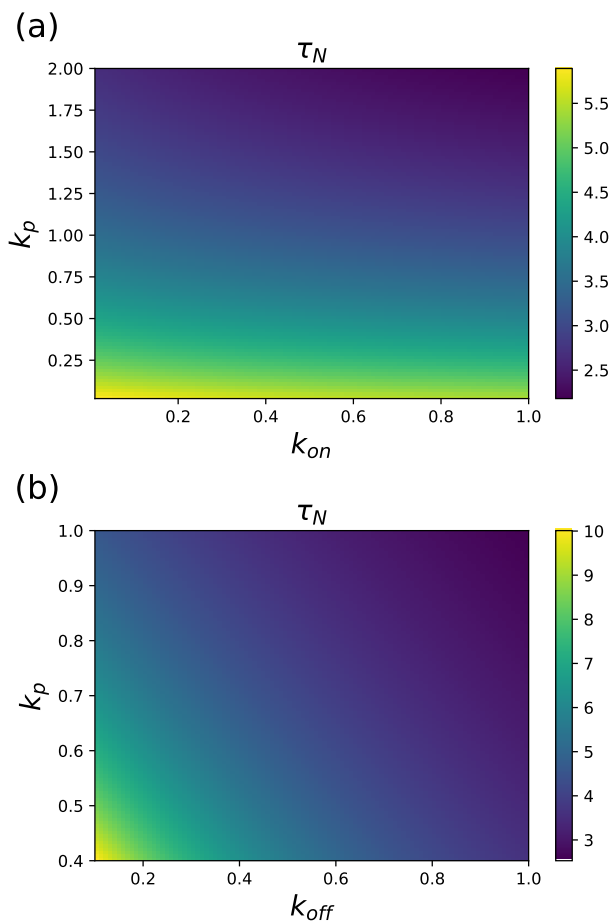

Figure S1: Heat maps for the relaxation times  $\tau_N$  (in seconds) as a function of the transition rates in the system: (a) varying  $k_p - k_{on}$  (in  $s^{-1}$ ) parameter space (with  $k_{off} = 1 s^{-1}$  and  $N = 6$ ), and (b) varying  $k_p - k_{off}$  ( $s^{-1}$ ) parameter space (with  $k_{on} = 1 s^{-1}$  and  $N = 6$ ).

## 2 Calculation of mean first-passage times and their variances

In this section, we calculate the mean first passage time to reach a specific state. Since we only consider the first-passage times, the system dynamics become independent of the initial equilibrium binding as shown in Fig S2. Here we present a model with homogeneous kinetic rates. The equations can be easily solved for inhomogeneous rates. We define  $F_n(t)$  as the probability to reach state  $N$  at time  $t$  if at  $t = 0$  the system starts in the state  $n = 1$ . Time evolution of this function is governed by following backward master equation:

$$\frac{dF_n}{dt} = k_p F_{n+1} - (k_{off} + k_p) F_n \quad (\text{S21})$$

with initial condition  $F_N(t) = \delta(t)$ . After performing Laplace transform we obtain

$$(s + k_p + k_{off}) \tilde{F}_n(s) = k_p \tilde{F}_{n+1}(s) \quad (\text{S22})$$

This equation leads to a full exact solution,

$$\tilde{F}_1(s) = \left( \frac{k_p}{s + k_{off} + k_p} \right)^{N-1}. \quad (\text{S23})$$

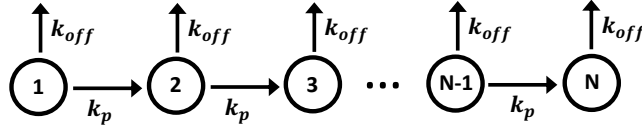

Figure S2: Schematic diagram for calculations of mean-first passage times.

We define  $T_n$  as a mean-first passage time to reach the state  $N$  from the the state  $n$ . Using the probability density function  $F_n(t)$ , it can be written as

$$\langle T_1 \rangle = \frac{\int_0^\infty t F_1(t) dt}{\int_0^\infty F_1(t) dt} = \frac{-\frac{\partial \tilde{F}_1}{\partial s} |_{s=0}}{\tilde{F}_n(s=0)}. \quad (\text{S24})$$

Thus, the first-passage time is given by

$$\langle T_1 \rangle = \frac{N-1}{k_{off} + k_p}. \quad (\text{S25})$$

Now we can calculate the second moment for mean-first passage time,

$$\langle T_1^2 \rangle = \frac{\int_0^\infty t^2 F_1(t) dt}{\int_0^\infty F_1(t) dt} = \frac{-\frac{\partial^2 \tilde{F}_1}{\partial s^2} |_{s=0}}{\tilde{F}_n(s=0)}. \quad (\text{S26})$$

which after some algebra leads to

$$\langle T_1^2 \rangle = \frac{N(N-1)}{(k_{off} + k_p)^2}. \quad (\text{S27})$$

Variance of mean first passage time is given by

$$\sigma T_1 = \sqrt{\langle T_1^2 \rangle - \langle T_1 \rangle^2} = \frac{\sqrt{N-1}}{k_{off} + k_p} \quad (\text{S28})$$

| TCR    | $IA^b + 3K$<br>mutation | $K_D$<br>( $\mu M$ ) | $k_{on}$<br>( $M^{-1}s^{-1}$ ) | $k_{off}$<br>(1/s) | $t_{1/2}$<br>(s) | Proliferation<br>EC <sub>50</sub> (nM) | TNF- $\alpha$<br>EC <sub>50</sub> (nM) |
|--------|-------------------------|----------------------|--------------------------------|--------------------|------------------|----------------------------------------|----------------------------------------|
| B3K506 | WT                      | 7                    | 101918                         | 0.7                | 0.9              | 0.2                                    | 3.1                                    |
| B3K506 | P5R                     | 11                   | 74654                          | 0.8                | 0.9              | 0.2                                    | 6.0                                    |
| B3K506 | P8R                     | 13                   | 64318                          | 0.8                | 0.8              | 0.3                                    | 7.0                                    |
| B3K506 | P-1A                    | 26                   | 101731                         | 2.6                | 0.3              | 9.0                                    | 68.0                                   |
| B3K506 | P8A                     | 92                   | 33370                          | 3.1                | 0.2              | 1200.0                                 | 2210.0                                 |
| B3K506 | P-1K                    | 101                  | 55149                          | 5.6                | 0.1              | 660.0                                  | 5500.0                                 |
| B3K508 | WT                      | 29                   | 10887                          | 0.3                | 2.2              | 0.4                                    | 6.0                                    |
| B3K508 | P5R                     | 93                   | 11048                          | 1.0                | 0.7              | 15.0                                   | 87.0                                   |
| B3K508 | P2A                     | 175                  | 19914                          | 3.5                | 0.2              | 71.0                                   | 530.0                                  |

Table 1: The data and kinetic parameters are taken from Ref. 7 in the main text.

| peptide<br>name | peptide<br>sequence | $k_{off}$ (1/s) | $k_{on} \times 10^{-3}$<br>( $M^{-1}s^{-1}$ ) | EC <sub>50</sub> ( $IFN-\gamma$ )<br>( $\mu g/ml$ pMHC) | predicted<br>activity |
|-----------------|---------------------|-----------------|-----------------------------------------------|---------------------------------------------------------|-----------------------|
| ESO-9C          | SLLMWITQC           | 0.82 $\pm$ 0.01 | 57 $\pm$ 3                                    | 115 $\pm$ 14                                            | foreign               |
| ESO-9L          | SLLMWITQL           | 0.93 $\pm$ 0.05 | 17 $\pm$ 2                                    | 42 $\pm$ 113                                            | self                  |
| ESO-9V          | SLLMWITQV           | 0.33 $\pm$ 0.01 | 45 $\pm$ 4                                    | 180 $\pm$ 19                                            | foreign               |
| ESO-3A          | SLAMWITQV           | 0.31 $\pm$ 0.01 | 47 $\pm$ 4                                    | 70 $\pm$ 15                                             | foreign               |
| ESO-3I          | SLIMWITQV           | 0.61 $\pm$ 0.04 | 35 $\pm$ 3                                    | 94 $\pm$ 16                                             | foreign               |
| ESO-3M          | SLMMWITQV           | 0.38 $\pm$ 0.01 | 42 $\pm$ 1                                    | 48 $\pm$ 7                                              | foreign               |
| ESO-3Y          | SLYMWITQV           | 1.15 $\pm$ 0.04 | 38 $\pm$ 1                                    | 240 $\pm$ 50                                            | self                  |
| ESO-4D          | SLLDWITQV           | 2.59 $\pm$ 0.15 | 10 $\pm$ 1                                    | 661 $\pm$ 85                                            | self                  |
| ESO-6V          | SLLMWVTQV           | 0.85 $\pm$ 0.03 | 49 $\pm$ 2                                    | 45 $\pm$ 5                                              | foreign               |
| ESO-6T          | SLLMWTTQV           | 1.30 $\pm$ 0.03 | 13 $\pm$ 1                                    | 228 $\pm$ 62                                            | self                  |
| ESO-7H          | SLLMWIHQV           | 1.73 $\pm$ 0.09 | 17 $\pm$ 2                                    | 526 $\pm$ 201                                           | self                  |
| A2-R65          | SLLMWITQV           | 1.93 $\pm$ 0.13 | 17 $\pm$ 1                                    | 479 $\pm$ 12                                            | self                  |
| A2-H70          | SLLMWITQV           | 0.22 $\pm$ 0.01 | 2.7 $\pm$ 0.1                                 | 151 $\pm$ 19                                            | foreign               |
| A2-H74          | SLLMWITQV           | 0.49 $\pm$ 0.01 | 19 $\pm$ 1                                    | 107 $\pm$ 12                                            | foreign               |
| A2-R75          | SLLMWITQV           | 0.39 $\pm$ 0.00 | 23 $\pm$ 1                                    | 99 $\pm$ 12                                             | foreign               |
| A2-V76          | SLLMWITQV           | 0.67 $\pm$ 0.01 | 31 $\pm$ 2                                    | 146 $\pm$ 38                                            | foreign               |
| A2-K146         | SLLMWITQV           | 0.48 $\pm$ 0.01 | 24 $\pm$ 2                                    | 179 $\pm$ 23                                            | foreign               |

Table 2: Kinetic parameters and activation potency 1G4 TCR interaction with pMHC variants. (table adapted from Ref. 31 in the main text).
